# Supplementary material
Source: Springer Nature journal article supplement (https://www.springermedizin.de/resource/supplementary/12906_2012_1251_MOESM2_ESM.pdf/9520040)

### A) Object recognition test

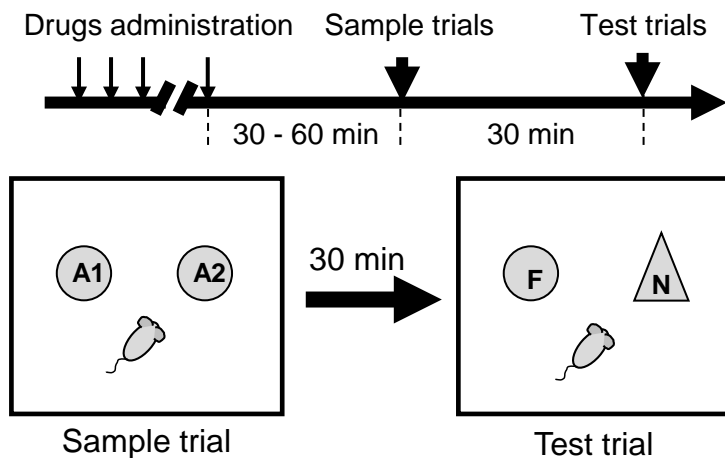

### B) Sample phase

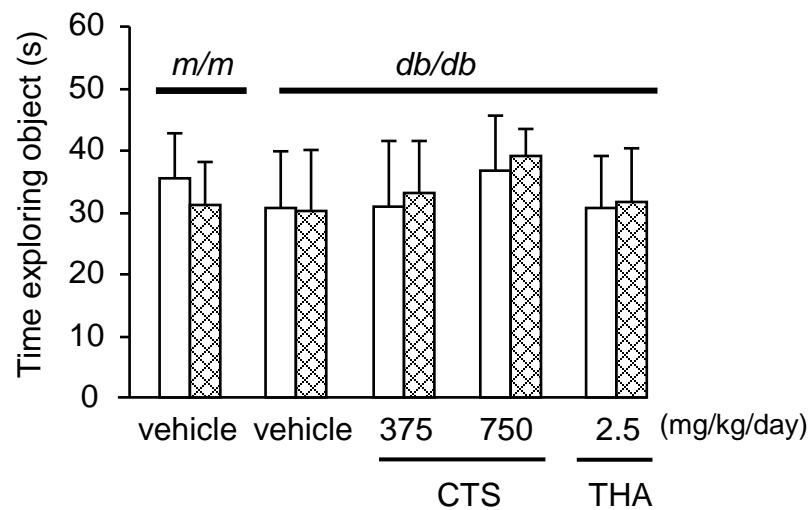

### C) Test trial

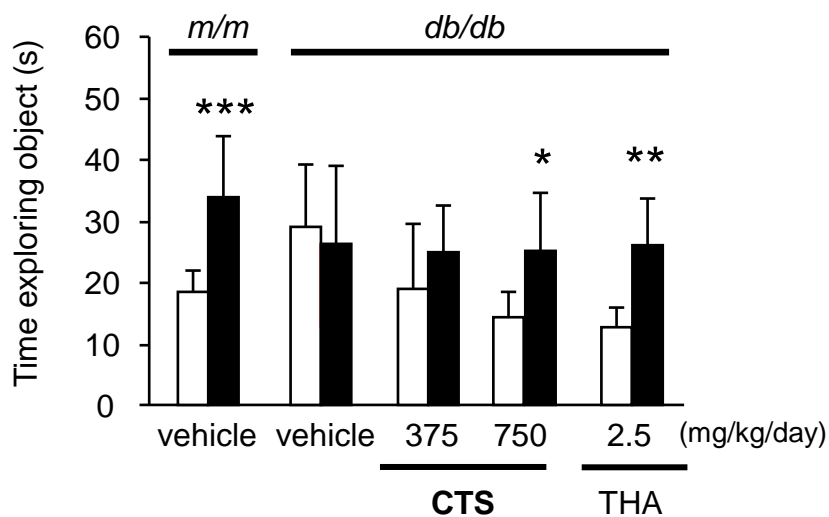

### D) Discrimination index (DI=(N-F)/(N+F))

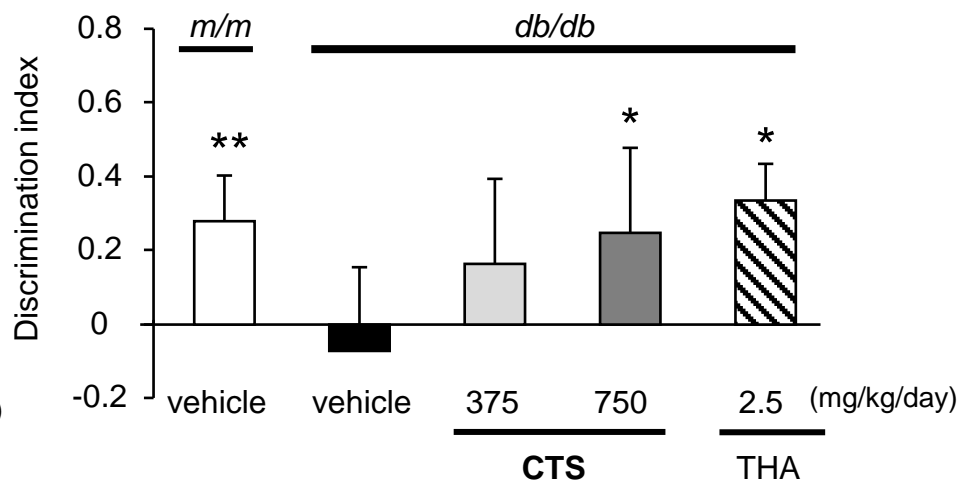

Supplement: MOESM2 [file 9520040]
